# Supplementary material
Source: publisher figshare collection journal article supplement (https://sage.figshare.com/ndownloader/files/23553638)
Supplement: Supplementary file 1 [file 23553638]

## Sheet: Sheet1
Articles	n	Outcomes categories	Outcomes b	r	α of DC a	α of DV	Female %	Minority %	Climate Measurement Type	Level	ICC1	Rating source	Publication status
Barnhart (2015)	96	Satisfaction	Group satisfaction	0.58	0.88	0.85	44.8	50	Diversity	Individual	--	Same source	Non-pub
Barnhart (2015)	96	Engagement	Engagement	0.61	0.88	0.9	44.8	50	Diversity	Individual	--	Same source	Non-pub
Barnhart (2015)	96	Performance	Organizational citizenship behavior	0.51	0.88	0.9	44.8	50	Diversity	Individual	--	Same source	Non-pub
Barton (2017)	67	Engagement	Engagement	0.428	0.93	0.94	100	14.9	Inclusion	Individual	--	Same source	Non-pub
Barton (2017)	67	Turnover	Turnover intention	-0.613	0.93	0.88	100	14.9	Inclusion	Individual	--	Same source	Non-pub
Bodla, Tang, Jiang, & Tian (2016)	60	Performance	Team creativity	0.13	0.71	0.78	--	--	Inclusion	Unit	0.38	Different sources	Pub
Boehm, Dwertmann et al. (2014)	211	Performance	Work group performance	0.21	0.66	0.58	18.6	40.9	Diversity	Unit	0.1	Same source	Pub
Boehm, Kunze et al. (2014)	93	Commitment	Collective social exchange	0.76	0.84	0.9	15	--	Diversity	Unit	0.13	Same source	Pub
Boehm, Kunze et al. (2014)	93	Satisfaction	Collective affective well-being at work	0.59	0.84	0.73	--	--	Diversity	Unit	0.13	Same source	Pub
Boehm, Kunze et al. (2014)	93	Turnover	Collective turnover intention	-0.4	0.84	0.73	--	--	Diversity	Unit	0.13	Same source	Pub
Boehm, Kunze et al. (2014)	93	Performance	Operational and financial performance	0.32	0.84	0.65	--	--	Diversity	Unit	0.13	Different sources	Pub
Bressler (2016)	293	Commitment	Group cohesion	0.56	0.95	0.9	51	22.6	Inclusion	Individual	--	Same source	Non-pub
Bressler (2016)	293	Performance	Helping	0.21	0.95	0.8	51	22.6	Inclusion	Individual	--	Same source	Non-pub
Brimhall (2019)	237	Satisfaction	Job satisfaction	0.27	0.93	0.92	65	75	Diversity	Individual	--	Same source	Pub
Brimhall (2019)	237	Performance	Perceived quality of care in hospital	0.29	0.93	0.91	65	75	Diversity	Individual	--	Same source	Pub
Brimhall, Mor Barak (2018)	247	Satisfaction	Job satisfaction	0.55	0.85	0.91	69	79	Diversity	Individual	--	Same source	Pub
Brimhall, Mor Barak (2018)	247	Performance	Perceived quality of care in hospital	0.42	0.85	0.96	69	79	Diversity	Individual	--	Same source	Pub
Bustamante (2010)	285	Turnover	Retention rate (reverse coded)	-0.24	0.71	1	53	12.8	Diversity	Unit	0.12	Different sources	Non-pub
Bustamante (2010)	285	Performance	Student graduation rate	0.25	0.71	1	53	12.8	Diversity	Unit	0.12	Different sources	Non-pub
Buttner & Lowe (2017)	182	Turnover	Turnover intention	-0.45	0.89	0.85	38	100	Diversity	Individual	--	Same source	Pub
Buttner et al. (2010)	182	Commitment	Organizational commitment	0.61	0.89	0.92	38	95	Diversity	Individual	--	Same source	Pub
Buttner et al. (2010)	182	Turnover	Turnover intention	-0.41	0.89	0.85	38	95	Diversity	Individual	--	Same source	Pub
Buttner et al. (2012)	154	Commitment	Organizational commitment	0.64	0.89	0.92	38	95	Diversity	Individual	--	Same source	Pub
Buttner et al. (2012)	154	Turnover	Turnover intention	-0.43	0.89	0.85	38	95	Diversity	Individual	--	Same source	Pub
Carstens, De Kock (2016)	35	Performance	Overall performance	0.42	0.96	0.862	40.6	32.5	Inclusion	Unit	--	Same source	Pub
Chen & Tang (2018)	257	Commitment	Organizational commitment	0.25	0.72	0.89	22.18	--	Inclusion	Individual	--	Same source	Pub
Chen & Tang (2018)	257	Performance	Role-based performance	0.12	0.72	0.87	22.18	--	Inclusion	Individual	--	Different sources	Pub
Chen et al. (2012)	305	Performance	Individual total sales	0.02	0.93	1	63.6	--	Diversity	Individual	--	Different sources	Pub
Chrobot-Mason & Aramovich (2013) sample 1	853	Turnover	Turnover intention	-0.36	0.87	0.87	30	19	Diversity	Individual	--	Same source	Pub
Chrobot-Mason & Aramovich (2013) sample 2	853	Turnover	Turnover intention	-0.33	0.87	0.86	30	19	Diversity	Individual	--	Same source	Pub
Chung, Ehrhart, Shore, Randel, Dean, Kedharnath (2019) sample 2	397	Commitment	Work group identification	0.43	0.85	0.78	--	--	Diversity	Individual	--	Same source	Pub
Chung, Ehrhart, Shore, Randel, Dean, Kedharnath (2019) sample 2	397	Commitment	Work group identification	0.58	0.94	0.78	--	--	Inclusion	Individual	--	Same source	Pub
Chung, Ehrhart, Shore, Randel, Dean, Kedharnath (2019) sample 2	397	Turnover	Turnover intention	-0.46	0.85	0.89	--	--	Diversity	Individual	--	Same source	Pub
Chung, Ehrhart, Shore, Randel, Dean, Kedharnath (2019) sample 2	397	Turnover	Turnover intention	-0.41	0.94	0.89	--	--	Inclusion	Individual	--	Same source	Pub
Chung, Ehrhart, Shore, Randel, Dean, Kedharnath (2019) sample 2	397	Performance	Helping	0.27	0.85	0.85	--	--	Diversity	Individual	--	Same source	Pub
Chung, Ehrhart, Shore, Randel, Dean, Kedharnath (2019) sample 2	397	Performance	Helping	0.51	0.94	0.85	--	--	Inclusion	Individual	--	Same source	Pub
Chung, Ehrhart, Shore, Randel, Dean, Kedharnath (2019) sample 3	806	Performance	Helping	0.2	0.86	0.94	51.6	50.3	Diversity	Individual	--	Different sources	Pub
Chung, Ehrhart, Shore, Randel, Dean, Kedharnath (2019) sample 3	806	Performance	Creativity	0.12	0.86	0.98	51.6	50.3	Diversity	Individual	--	Different sources	Pub
Chung, Ehrhart, Shore, Randel, Dean, Kedharnath (2019) sample 3	806	Performance	Job performance	0.16	0.86	--	51.6	50.3	Diversity	Individual	--	Different sources	Pub
Chung, Ehrhart, Shore, Randel, Dean, Kedharnath (2019) sample 3	806	Performance	Helping	0.19	0.94	0.94	51.6	50.3	Inclusion	Individual	--	Different sources	Pub
Chung, Ehrhart, Shore, Randel, Dean, Kedharnath (2019) sample 3	806	Performance	Creativity	0.26	0.94	0.98	51.6	50.3	Inclusion	Individual	--	Different sources	Pub
Chung, Ehrhart, Shore, Randel, Dean, Kedharnath (2019) sample 3	806	Performance	Job performance	0.25	0.94	--	51.6	50.3	Inclusion	Individual	--	Different sources	Pub
Cole (2013)	227	Satisfaction	Job satisfaction	0.457	0.913	0.867	69	20	Diversity	Individual	--	Same source	Non-pub
Cole (2013)	227	Turnover	Turnover intention	-0.409	0.913	0.93	69	20	Diversity	Individual	--	Same source	Non-pub
Cole (2013)	227	Performance	OCB-O	0.421	0.913	0.86	69	20	Diversity	Individual	--	Same source	Non-pub
Cole (2013)	227	Performance	OCB-I	0.373	0.913	0.79	69	20	Diversity	Individual	--	Same source	Non-pub
Cole et al. (2016)	227	Commitment	Organizational identification	0.53	0.93	0.92	68	20	Diversity	Individual	--	Same source	Pub
Collini (2012)	201	Engagement	Engagement	0.7	0.6	0.81	87.8	11.5	Diversity	Unit		Same source	Non-pub
Collini (2012)	201	Turnover	Turnover rate	-0.21	0.6	1	87.8	11.5	Diversity	Unit	0.059	Different sources	Non-pub
Daniels (2012)	319	Commitment	Organizational commitment	-0.06	0.93	0.81	69	11	Diversity	Individual	--	Same source	Non-pub
Daniels (2012)	319	Turnover	Turnover intention	0	0.93	0.83	69	11	Diversity	Individual	--	Same source	Non-pub
Davies, Stoermer, & Froese (2019)	175	Turnover	Turnover intention	-0.4	0.8	0.88	42.3	--	Diversity	Individual	--	Same source	Pub
Dhanesh & Duthler (2017)	107	Engagement	Employee engagement	0.57	0.82	0.92	60	--	Diversity	Individual	--	Same source	Non-pub
Downey (2012)	417	Engagement	Engagement	0.486	0.92	0.776	54.1	13.4	Inclusion	Individual	--	Same source	Non-pub
Dwertmann & Boehm (2016)	1253	Performance	Individual performance	0.02	0.94	1	62.8	--	Inclusion	Individual	--	Different sources	Pub
Ely et al. (2012)	812	Performance	Total performance	0.16	0.75	1	82	53	Diversity	Unit	0.05	Different sources	Pub
Gonzalez & Denisi (2009)	291	Commitment	Affective commitment	0.09	0.8	0.82	56.3	45.3	Diversity	Individual	--	Same source	Pub
Gonzalez & Denisi (2009)	291	Commitment	Organizational identification	0.05	0.8	0.83	56.3	45.3	Diversity	Individual	--	Same source	Pub
Gonzalez & Denisi (2009)	291	Turnover	Intention to quit	-0.15	0.8	0.83	56.3	45.3	Diversity	Individual	--	Same source	Pub
Guchait et al. (2016)	128	Satisfaction	Communication satisfaction	0.39	0.79	0.84	58	52.5	Diversity	Unit	--	Same source	Pub
Guchait et al. (2016)	128	Performance	Learning behavior	0.62	0.79	0.85	58	52.5	Diversity	Unit	--	Same source	Pub
Guerrero et al. (2013)	210	Commitment	Inclusion	0.61	0.76	0.81	29.8	57	Diversity	Individual	--	Same source	Pub
Hankins (2005)	320	Satisfaction	Job satisfaction	0.395	0.93	0.94	66	15.3	Diversity	Individual	--	Same source	Non-pub
Hedman (2016)	869	Satisfaction	Job satisfaction	0.5	0.88	--	20.5	40.9	Diversity	Individual	--	Same source	Non-pub
Hedman (2016)	869	Satisfaction	Job satisfaction	0.57	0.88	--	20.5	40.9	Inclusion	Individual	--	Same source	Non-pub
Hedman (2016)	869	Turnover	Intention to quit	-0.43	0.88	--	20.5	40.9	Diversity	Individual	--	Same source	Non-pub
Hedman (2016)	869	Turnover	Intention to quit	-0.57	0.88	--	20.5	40.9	Inclusion	Individual	--	Same source	Non-pub
Herres (2013)	554	Satisfaction	Job satisfaction	0.34	0.83	0.85	41.6	--	Diversity	Individual	--	Same source	Non-pub
Herres (2013)	554	Engagement	Engagement	0.29	0.83	0.9	41.6	--	Diversity	Individual	--	Same source	Non-pub
Hicks-Clarke (2000)	204	Satisfaction	Job satisfaction	0.37	0.83	0.87	65	98.5	Diversity	Individual	--	Same source	Pub
Hobman et al. (2004)	119	Engagement	Job involvement	0.5	0.88	0.9	84.87	5	Diversity	Individual	--	Same source	Pub
Holmes et al. (2013)	116	Commitment	Affective commitment	0.412	0.92	0.893	41	33	Diversity	Individual	--	Same source	Non-pub
Holmes et al. (2013)	116	Satisfaction	Job satisfaction	0.366	0.92	0.922	41	33	Diversity	Individual	--	Same source	Non-pub
Houkamau & Boxall (2011)	500	Commitment	Affective commitment	0.67	0.89	0.76	50	33.4	Diversity	Individual	--	Same source	Pub
Houkamau & Boxall (2011)	500	Satisfaction	Job satisfaction	0.48	0.89	--	50	33.4	Diversity	Individual	--	Same source	Pub
Huettermann et al. (2015)	125	Turnover	Turnover intention	-0.72	0.82	0.77	53	--	Diversity	Unit	0.13	Same source	Non-pub
Huettermann et al. (2015)	125	Performance	Innovative performance	0.38	0.82	0.51	53	--	Diversity	Unit	0.13	Different sources	Non-pub
Jagusztyn (2010)	433	Commitment	Organizational commitment	0.44	0.94	0.93	69	45.5	Diversity	Individual	--	Same source	Pub
Jagusztyn (2010)	433	Satisfaction	Job satisfaction	0.3	0.94	0.89	69	45.5	Diversity	Individual	--	Same source	Pub
Jagusztyn (2010)	433	Turnover	Turnover intention	-0.3	0.94	--	69	45.5	Diversity	Individual	--	Same source	Pub
Jahuri & Singh (2013)	229	Commitment	Organizational loyalty	0.68	0.91	0.86	23.1	--	Diversity	Individual	--	Same source	Pub
Kunze et al. (2011)	128	Commitment	Affective commitment	0.57	0.76	0.83	39	--	Diversity	Unit	0.09	Same source	Pub
Kunze et al. (2011)	128	Performance	Company performance	0.17	0.76	0.87	39	--	Diversity	Unit	0.09	Different sources	Pub
Kunze et al. (2013)	147	Performance	Company performance	0.23	0.68	0.61	42	--	Diversity	Unit	0.05	Different sources	Pub
Lauring & Selmer (2011)	489	Satisfaction	Group satisfaction	0.62	0.84	0.91	28.5	--	Diversity	Individual	--	Same source	Pub
Le, Jiang, Fujimoto, & Nielsen (2018)	253	Satisfaction	Affective well-being	0.34	0.67	0.92	62.5	--	Inclusion	Individual	--	Same source	Pub
Lee, Zhang, Dallas, & Chin (2019)	313	Commitment	Affective commitment	0.55	0.9	0.89	45.4	--	Diversity	Individual	--	Same source	Pub
Li, Lin, Tien, & Chen (2017)	57	Performance	Team creativity	0.08	0.58	0.87	13	78.13	Inclusion	Unit	0.18	Different sources	Pub
Li, Zhu, Li, Chattopadhyay, Geroge (2017)	497	Performance	Job performance	-0.1	0.93	0.83	68	--	Inclusion	Individual	--	Different sources	Non-pub
Lingard & Lin (2004)	109	Commitment	Organizational commitment	0.498	0.9	0.9	100	--	Diversity	Individual	--	Same source	Pub
Lingard & Lin (2004)	109	Satisfaction	Career satisfaction	0.177	0.9	0.8	100	--	Diversity	Individual	--	Same source	Pub
Lingard & Lin (2004)	109	Engagement	Job involvement	0.028	0.9	0.9	100	--	Diversity	Individual	--	Same source	Pub
Luu (2019a) sample 1	307	Performance	Service innovative behavior	0.32	0.84	0.87	56.35	--	Diversity	Individual	--	Same source	Pub
Luu (2019a) sample 2	384	Performance	Service innovative behavior	0.27	0.8	0.81	60.15	--	Diversity	Individual	--	Same source	Pub
Luu (2019b)	502	Satisfaction	Job satisfaction	0.46	0.77	0.81	40.64	--	Diversity	Individual	--	Same source	Pub
Madera et al. (2013)	130	Satisfaction	Job satisfaction	0.41	0.83	0.85	47.9	44	Diversity	Individual	--	Same source	Pub
McKay et al. (2009)	654	Performance	Sales percentage change	0.2	0.56	1	85.5	34	Diversity	Unit	0.03	Different sources	Pub
McKay et al. (2011)	769	Performance	Customer satisfaction	0.2	0.78	1	85.7	32.2	Diversity	Unit	0.03	Different sources	Pub
McKay et al. (2017)	782	Turnover	Voluntary turnover rate	0.03	0.76	1	86	32.2	Diversity	Unit	0.03	Different sources	Pub
McKay et al. (2017)	782	Performance	Sales revenue	0.09	0.76	1	86	32.2	Diversity	Unit	0.03	Different sources	Pub
Menassa (2007)	311	Commitment	Affective commitment	0.432	0.664	0.845	--	--	Diversity	Individual	--	Same source	Non-pub
Menassa (2007)	311	Satisfaction	Job satisfaction	0.429	0.664	0.859	--	--	Diversity	Individual	--	Same source	Non-pub
Moon (2018)	396	Turnover	Voluntary turnover rate	-0.21	0.79	1	--	--	Diversity	Unit	--	Different sources	Pub
Moon (2018)	387	Turnover	Actual turnover	-0.269	0.97	1	--	--	Diversity	Unit	0.03	Different sources	Pub
Moon (2018)	387	Turnover	Actual turnover	-0.224	0.97	1	--	--	Inclusion	Unit	0.03	Different sources	Pub
Moon (2018)	387	Performance	Innovative behavior	0.458	0.97	--	--	--	Diversity	Unit	0.03	Same source	Pub
Moon (2018)	387	Performance	Innovative behavior	0.652	0.97	--	--	--	Inclusion	Unit	0.03	Same source	Pub
Nag (2011) sample 1	871	Commitment	Organizational commitment	0.5	0.84	0.85	53.2	32.4	Diversity	Individual	--	Same source	Non-pub
Nag (2011) sample 1	871	Performance	Individual performance	0.08	0.84	1	53.2	32.4	Diversity	Individual	--	Different sources	Non-pub
Nag (2011) sample 2	688	Commitment	Organizational commitment	0.45	0.83	0.82	47.5	32.1	Diversity	Individual	--	Same source	Non-pub
Nag (2011) sample 2	688	Performance	Individual performance	0.08	0.83	1	47.5	32.1	Diversity	Individual	--	Different sources	Non-pub
Newman, Nielsen, Smyth, Hirst, & Kennedy (2018)	135	Commitment	Affective commitment	0.17	0.81	0.9	15	100	Diversity	Individual	--	Same source	Pub
Newman, Nielsen, Smyth, Hirst, & Kennedy (2018)	135	Turnover	Turnover intention	-0.1	0.81	0.77	15	100	Diversity	Individual	--	Same source	Pub
Nishii (2013)	100	Satisfaction	Collective job satisfaction	0.51	0.64	0.7	57	29	Inclusion	Unit	0.13	Same source	Pub
Nishii (2013)	100	Turnover	Unit turnover	-0.23	0.64	1	57	29	Inclusion	Unit	0.13	Different sources	Pub
Paez (2006)	172	Commitment	Organizational commitment	0.451	0.8	0.82	65.7	25	Diversity	Individual	--	Same source	Non-pub
Paez (2006)	172	Satisfaction	Job satisfaction	0.393	0.8	0.93	65.7	25	Diversity	Individual	--	Same source	Non-pub
Paolillo et al. (2017)	207	Satisfaction	Job satisfaction	0.3	0.74	0.76	50	--	Diversity	Individual	--	Same source	Pub
Paolillo, Silva, & Pasini (2016)	481	Performance	Participation behavior	0.37	0.76	0.7	11.6	7.3	Diversity	Individual	--	Same source	Pub
Paolillo, Silva, & Pasini (2016)	481	Performance	Participation behavior	0.41	0.83	0.7	11.6	7.3	Inclusion	Individual	--	Same source	Pub
Parks et al. (2008) sample 1	233	Commitment	Organizational commitment	0.53	0.87	0.9	100	100	Diversity	Individual	--	Same source	Pub
Parks et al. (2008) sample 1	233	Satisfaction	Job satisfaction	0.67	0.87	0.8	100	100	Diversity	Individual	--	Same source	Pub
Parks et al. (2008) sample 2	196	Commitment	Organizational commitment	0.6	--	0.9	100	100	Diversity	Individual	--	Same source	Pub
Phouthonephackdy (2016)	290	Turnover	Turnover intention	-0.29	0.86	0.85	53	52	Diversity	Individual	--	Same source	Non-pub
Randel et al. (2016)	534	Performance	Helping	0.24	0.84	0.88	47.5	47.2	Diversity	Individual	--	Same source	Pub
Reinwald, Huettermann, & Bruch (2019)	82	Satisfaction	Collective positive affect	0.71	0.87	0.89	43.32		Diversity	Unit	0.14	Same source	Pub
Reinwald, Huettermann, & Bruch (2019)	82	Performance	Company performance	0.42	0.87	0.8	43.32		Diversity	Unit	0.14	Different sources	Pub
Richard, Avery, Luksyte, Boncoeur (2019) sample 1	113	Performance	Creative job performance	0.28	0.86	0.93	66	73	Diversity	Individual	--	Different sources	Pub
Richard, Avery, Luksyte, Boncoeur (2019) sample 2	198	Performance	Creative job performance	0.53	0.85	0.81	53	34.8	Diversity	Individual	--	Same source	Pub
Richard, Avery, Luksyte, Boncoeur (2019) sample 3	110	Performance	Creative job performance	0.26	0.92	0.94	41	63	Diversity	Individual	--	Different sources	Pub
Rineer (2015)	274	Commitment	Team cohesion	0.4	0.87	0.93	10.2	19.6	Diversity	Individual	--	Same source	Non-pub
Rodriguez (2018)	221	Engagement	Engagement	0.45	0.91	0.94	84.1	75.3	Diversity	Individual	--	Same source	Non-pub
Rosado-Solomon (2017)	317	Satisfaction	Psychological well-being	0.1	0.86	0.84	47	19	Diversity	Individual	--	Same source	Non-pub
Sahin, van der Toorn, Jansen, Boezeman, & Ellemers (2019)	887	Satisfaction	Job satisfaction	0.32	0.96	0.92	58.53	--	Inclusion	Individual	--	Same source	Pub
Sahin, van der Toorn, Jansen, Boezeman, & Ellemers (2019)	887	Turnover	Turnover intention	-0.11	0.96	0.76	58.53	--	Inclusion	Individual	--	Same source	Pub
Settles & O'Connor (2014) sample 1	458	Satisfaction	Satisfaction	0.48	0.93	0.9	100	17.77	Diversity	Individual	--	Same source	Pub
Settles & O'Connor (2014) sample 2	458	Satisfaction	Satisfaction	0.23	0.93	0.9	0	13.03	Diversity	Individual	--	Same source	Pub
Sharif (2014)	190	Satisfaction	Job satisfaction	0.59	0.94	0.91	53	--	Diversity	Individual	--	Same source	Non-pub
Sharif (2014)	190	Turnover	Turnover intention	-0.39	0.94	0.92	53	--	Diversity	Individual	--	Same source	Non-pub
Sharif (2014)	190	Performance	Performance	0.3	0.94	0.91	53	--	Diversity	Individual	--	Different sources	Non-pub
Sharif (2014)	190	Performance	OCBs	0.14	0.94	0.88	53	--	Diversity	Individual	--	Different sources	Non-pub
Singh & Selvarajan (2013)	165	Turnover	Intention to stay (reverse coded)	-0.41	0.86	0.72	28	39	Diversity	Individual	--	Same source	Pub
Singh, Winkel, Selvarajan (2013)	165	Performance	Organizational citizenship behavior	0.343152	0.86	0.734177	28	39	Diversity	Individual	--	Different sources	Pub
Sliter et al. (2014)	172	Engagement	Engagement	0.33	0.93	0.89	100	0	Diversity	Individual	--	Same source	Pub
Stewart et al. (2011)	348	Turnover	Intention to leave	-0.54	0.85	0.73	55	37.65	Diversity	Individual	--	Same source	Pub
Taylor (2011)	209	Commitment	Organizational identification	0.46	0.91	0.78	68	32	Diversity	Individual	--	Same source	Non-pub
Taylor (2015) sample 1	415	Commitment	Organizational identification	0.54	0.93	0.6	23.92	--	Diversity	Individual	--	Same source	Non-pub
Taylor (2015) sample 2	356	Performance	Self-rated creative performance	0.22	0.93	0.93	23.92	--	Diversity	Individual	--	Same source	Non-pub
Taylor (2015) sample 3	318	Performance	Supervisor-rated creative performance	0.03	0.93	0.94	23.92	--	Diversity	Individual	--	Different sources	Non-pub
Tenglund (2000) Sample 1	288	Commitment	Organizational commitment	0.37	0.84	0.77	59	55.9871	Diversity	Individual	--	Same source	Non-pub
Tenglund (2000) Sample 1	288	Satisfaction	Job satisfaction	0.366	0.84	0.8	59	55.9871	Diversity	Individual	--	Same source	Non-pub
Tenglund (2000) Sample 1	288	Turnover	Turnover intention	-0.205	0.84	0.89	59	55.9871	Diversity	Individual	--	Same source	Non-pub
Tenglund (2000) Sample 2	287	Commitment	Organizational commitment	0.317	0.86	0.86	64	4	Diversity	Individual	--	Same source	Non-pub
Tenglund (2000) Sample 2	287	Satisfaction	Job satisfaction	0.198	0.86	0.94	64	4	Diversity	Individual	--	Same source	Non-pub
Tenglund (2000) Sample 2	287	Turnover	Turnover intention	-0.09	0.86	0.94	64	4	Diversity	Individual	--	Same source	Non-pub
Trau (2015)	654	Satisfaction	Job satisfaction	0.29	0.91	0.89	32	35	Diversity	Individual	--	Same source	Pub
Triana & Garcia (2009)	181	Commitment	Affective commitment	0.25	0.84	0.83	50	86	Diversity	Individual	--	Same source	Pub
Triana & Garcia (2009)	181	Performance	Organizational citizenship behavior	0.18	0.84	0.9	50	86	Diversity	Individual	--	Same source	Pub
Triana et al. (2010) sample 1	103	Commitment	Affective commitment	0.24	0.75	0.89	73	6	Diversity	Individual	--	Same source	Pub
Triana et al. (2010) sample 2	171	Commitment	Affective commitment	0.25	0.78	0.81	44	89	Diversity	Individual	--	Same source	Pub
Triana et al. (2010) sample 2	171	Turnover	Turnover intention	-0.2	0.78	0.82	44	89	Diversity	Individual	--	Same source	Pub
Triana et al. (2010) sample 3	131	Commitment	Affective commitment	0.52	0.93	0.88	77	100	Diversity	Individual	--	Same source	Pub
Triana et al. (2010) sample 3	131	Turnover	Turnover intention	-0.24	0.93	0.92	77	100	Diversity	Individual	--	Same source	Pub
Tuan, Rowley, Thao (2019)	1174	Engagement	Engagement	0.39	0.82	0.84	39.01	--	Diversity	Individual	--	Same source	Pub
Veldman et al. (2017)	657	Satisfaction	Job satisfaction	0.27	0.7	1	38	4.1	Diversity	Individual	--	Same source	Pub
Veldman et al. (2017)	657	Turnover	Turnover intention	-0.26	0.7	0.5	38	4.1	Diversity	Individual	--	Same source	Pub
Veldman et al. (2017)	657	Performance	Job performance	0.16	0.7	0.71	38	4.1	Diversity	Individual	--	Same source	Pub
Victorino et al. (2013)	426	Satisfaction	Job satisfaction	0.462	0.747	--	39.2	12.5	Diversity	Unit	0.11	Same source	Pub
Virick & Greer (2012)	98	Performance	Performance rating	-0.19	0.92	--	28	--	Diversity	Individual	--	Different sources	Pub
Volpone (2013) sample 1	102	Satisfaction	Job satisfaction	-0.03	0.93	0.84	39	93.5	Diversity	Individual	--	Same source	Non-pub
Volpone (2013) sample 1	102	Performance	Job performance	0.11	0.93	0.88	39	93.5	Diversity	Individual	--	Same source	Non-pub
Volpone (2013) sample 2	89	Performance	Job performance	0.18	0.85	0.79	46.1	37.1	Diversity	Individual	--	Different sources	Non-pub
Volpone (2013) sample 3	1400	Satisfaction	Job satisfaction	0.36	0.9	0.94	50.9	29.7	Diversity	Individual	--	Same source	Non-pub
Walsh et al. (2010) individual level	1394	Satisfaction	Job satisfaction	0.380276	0.868902	0.85	25.6	43	Diversity	Individual	--	Same source	Pub
Walsh et al. (2010) unit level	66	Satisfaction	Job satisfaction	0.466459	0.848329	0.85	25.6	43	Diversity	Unit	0.056	Same source	Pub
Wessel & Ryan (2012) sample 1	166	Satisfaction	Job satisfaction	0.38	0.92	0.86	0	17	Diversity	Individual	--	Same source	Pub
Wessel & Ryan (2012) sample 2	47	Satisfaction	Job satisfaction	0.53	0.92	0.86	100	12	Diversity	Individual	--	Same source	Pub
Wolfson et al. (2011)	1126	Commitment	Organizational commitment	0.61	0.74	0.75	51.7	30.4	Diversity	Individual	--	Same source	Pub
Wolfson et al. (2011)	1126	Satisfaction	Job satisfaction	0.66	0.74	0.91	51.7	30.4	Diversity	Individual	--	Same source	Pub
Zacher & Yang, (2016)	649	Commitment	Organizational commitment	0.49	0.84	0.93	58.6	--	Diversity	Individual	--	Same source	Pub
Zacher & Yang, (2016)	649	Satisfaction	Job satisfaction	0.47	0.84	0.85	58.6	--	Diversity	Individual	--	Same source	Pub
Zacher & Yang, (2016)	649	Turnover	Motivation to continue working (reverse)	-0.13	0.84	0.95	58.6	--	Diversity	Individual	--	Same source	Pub
Note. n = sample size. DC = diversity climate. NA & -- = information was not provided in the primary studies.
a Values in boldface and italicized were ICC(2) and all other values were Cronbach’s alphas.
Female % = percentage of female employees of the sample; Minority % = percentage of minority employees of the sample. ICC(1) = ICC(1) value of diversity climate. Individual = correlations reported at the individual level; Unit = correlations reported at the unit level.
